# Supplementary material
Source: PubMed Central journal article supplement (PMC6028187)
Supplement: NIHMS977544-supplement-supplement_1.pdf [file NIHMS977544-supplement-supplement_1.pdf]

# OCULUS - PENTACAM Show 2 Exams Topometric

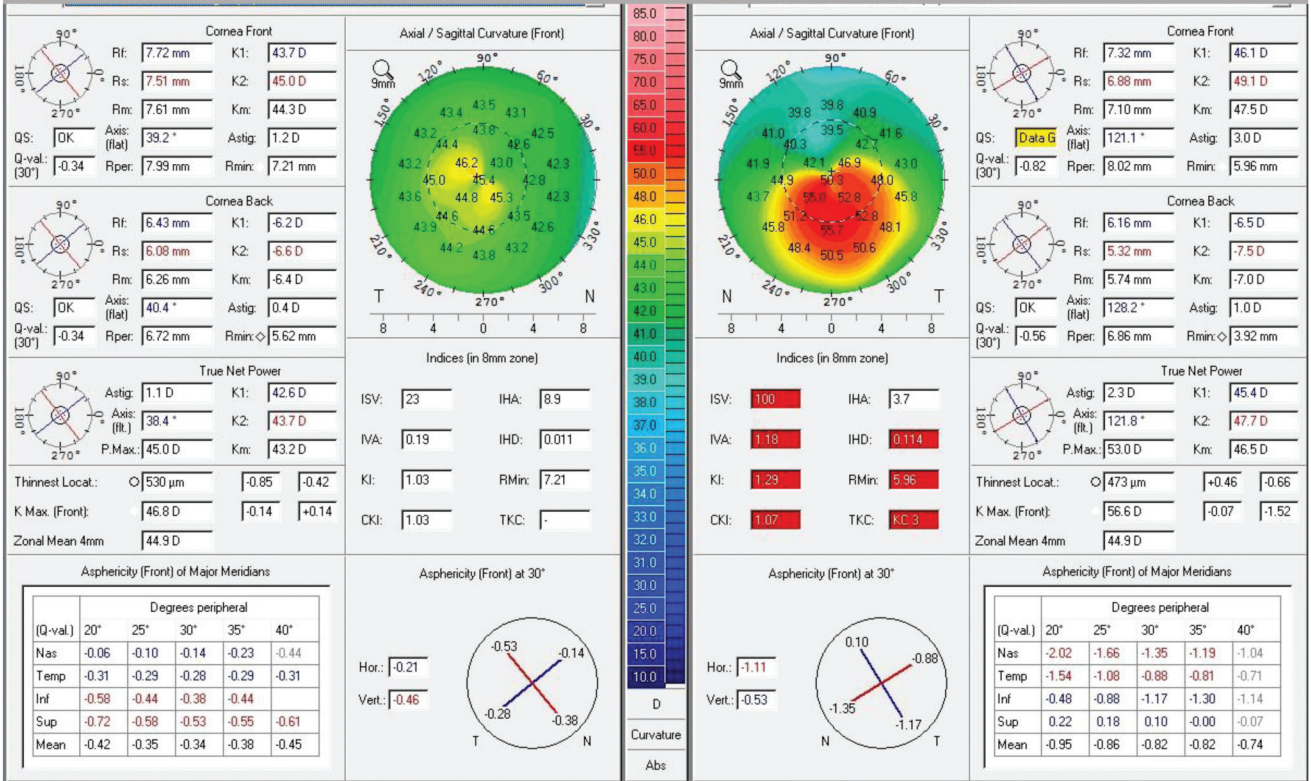

Figure A. Example of forme fruste keratoconus in the right eye.

# OCULUS - PENTACAM Show 2 Exams Topometric

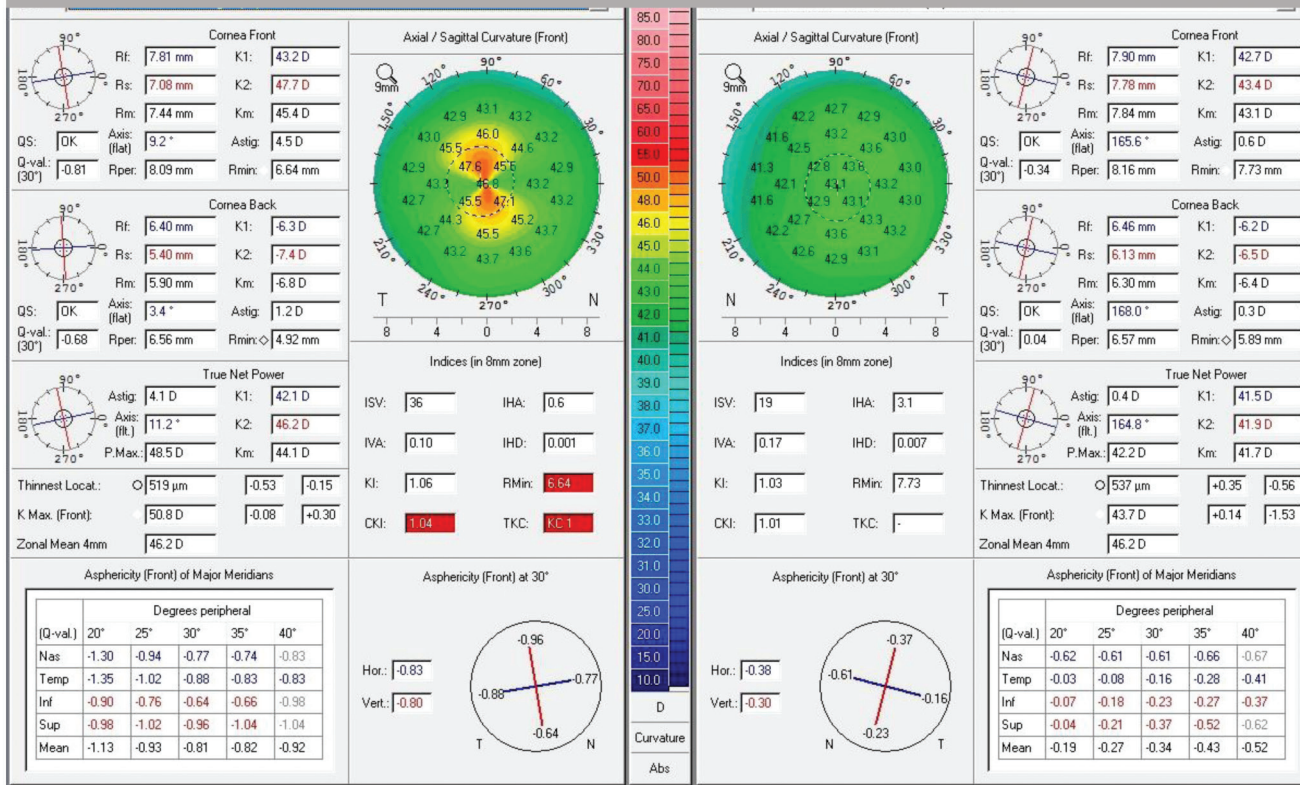

Figure B. Example of forme fruste keratoconus in the left eye.

### OCULUS - PENTACAM 4 Maps Refractive

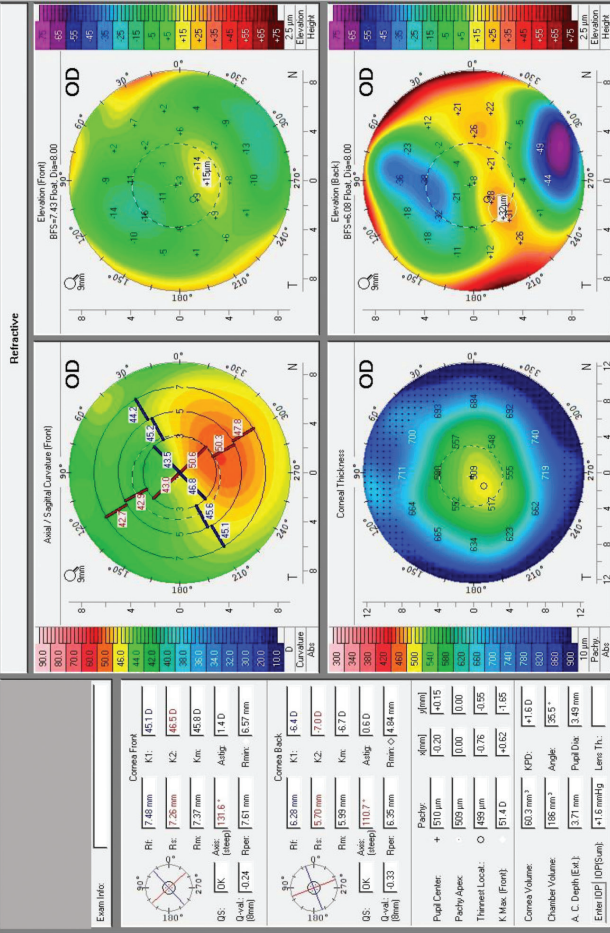

### OCULUS - PENTACAM 4 Maps Refractive

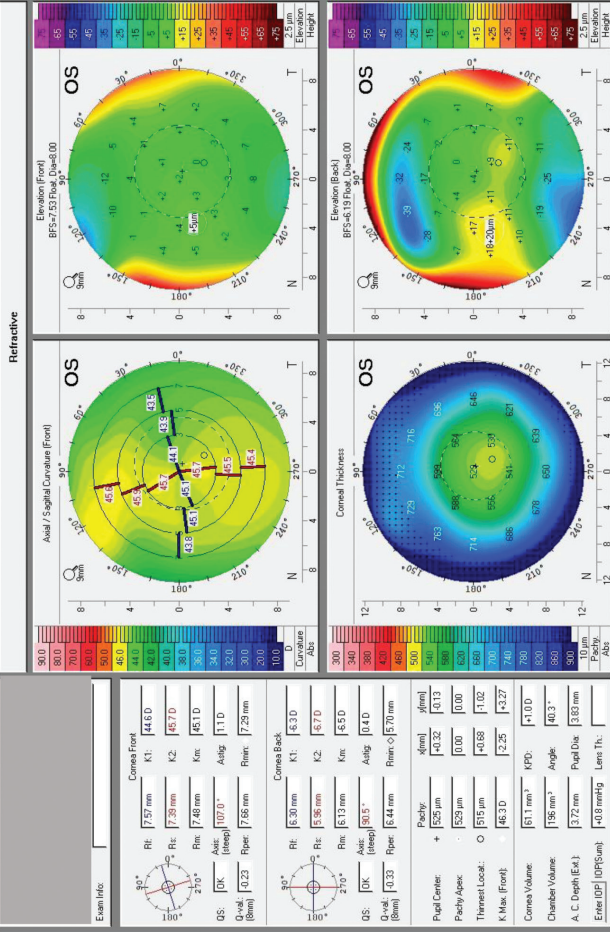

Figure C. Example of forme fruste keratoconus in the left eye.

TABLE A  
**Parameters From Corneal Tomography (Extracted From Oculus Pentacam HR)**

| Parameter                      | Operation Definition                                                               | Interpretation                                                                                                                                                                 |
|--------------------------------|------------------------------------------------------------------------------------|--------------------------------------------------------------------------------------------------------------------------------------------------------------------------------|
| ISV                            | Standard deviation of individual corneal sagittal radii from the mean curvature    | Expression of the corneal surface irregularity                                                                                                                                 |
| IVA                            | Measurement of the mean difference between superior and inferior corneal curvature | The value of curvature symmetry, similar to commonly used inferior/superior ratio                                                                                              |
| IHD                            | Decentration of elevation data in the vertical direction                           | Provides the degree of decentration in the vertical direction                                                                                                                  |
| Enhanced BFS front             | Variable of the anterior corneal elevation                                         | Enhanced anterior best fit sphere                                                                                                                                              |
| Enhanced BFS back              | Variable of the posterior corneal elevation                                        | Enhanced back best fit sphere                                                                                                                                                  |
| Elevation B BFS Apex           | Variable of the posterior corneal apex elevation                                   | Best fit sphere posterior of the corneal apex                                                                                                                                  |
| Elevation B BFS Thinnest       | Variable of the posterior corneal thinnest point elevation                         | Best fit sphere posterior of the corneal thinnest point                                                                                                                        |
| Elevation B BFS Max 4-mm Zone  | Variable of the posterior corneal elevation                                        | Best fit sphere of the posterior cornea outside 4-mm zone from thinnest point                                                                                                  |
| Elevation B BFTE Apex          | Variable of the posterior corneal apex elevation                                   | Best fit toric ellipsoid posterior of the corneal apex                                                                                                                         |
| Elevation B BFTE Thinnest      | Variable of the posterior corneal thinnest point elevation                         | Best fit toric ellipsoid posterior of the thinnest point                                                                                                                       |
| Elevation B BFTE Max 4-mm Zone | Variable of the posterior corneal elevation                                        | Best fit toric ellipsoid of the posterior cornea outside 4-mm zone from thinnest point                                                                                         |
| BAD-D                          | Belin/Ambrósio display                                                             | The D values represent the mean deviation, representing the pachymetric progression                                                                                            |
| ART Max                        | Ambrósio relational thickness maximum                                              | Division of the thinnest point by the RPI Maximum                                                                                                                              |
| ART Average                    | Ambrósio relational thickness average                                              | Division of the thinnest point by the RPI Average                                                                                                                              |
| RPI Max                        | Relative pachymetric index maximum                                                 | The value of pachymetric progression is calculated by reference to the average curve. For each meridian, a maximum value that expresses pachymetric progression is calculated. |
| RPI Average                    | Relative pachymetric index average                                                 | The value of pachymetric progression is calculated by reference to the average curve. For each meridian, a maximum value that expresses pachymetric progression is calculated. |

*ISV = index of surface variance; IVA = index of vertical asymmetry; IHD = index of height decentration  
The Oculus Pentacam HR is manufactured by Oculus Optikgeräte, Wetzlar, Germany.*



TABLE B

**Variables Derived From the Signal of the Dynamic Bidirectional Applanation Device<sup>a</sup>**

| Variable                    | Operation Definition                                                        | Interpretation                                                       |
|-----------------------------|-----------------------------------------------------------------------------|----------------------------------------------------------------------|
| <b>Group 1</b>              |                                                                             |                                                                      |
| A1                          | Peak intensity of first applanation event                                   | Maximum surface area achieving planarity during inward deformation   |
| A2                          | Peak intensity of second applanation event                                  | Maximum surface area achieving planarity during recovery             |
| Applanation peak difference | A2–A1                                                                       | Difference in maximum planarity between inward and recovery phases   |
| Concavity min               | Minimum applanation intensity between A1 and A2                             | Depth and irregularity (nonplanarity) of deformation                 |
| Concavity mean              | Mean applanation intensity between A1 and A2                                | Depth and irregularity of deformation average                        |
| <b>Group 2</b>              |                                                                             |                                                                      |
| Average P1P2                | (P1+P2)/2                                                                   | Average of the pressures at the 2 applanation events                 |
| Pmax                        | Peak value of pressure signal                                               | Force and time required to reach first applanation event             |
| <b>Group 3</b>              |                                                                             |                                                                      |
| Concavity duration          | Time lapse between A1 and A2                                                | Temporal delay of deformation recovery between applanation events    |
| Concavity time              | Time from onset of applied pressure to A1                                   | Time required to achieve maximum deformation from onset of impulse   |
| Lag time                    | Time between Pmax and concavity min                                         | Delay between peak applied pressure and maximum deformation          |
| Applanation onset time      | Time from onset of applied pressure to A1                                   | Time required to achieve first applanation from onset of impulse     |
| <b>Group 4</b>              |                                                                             |                                                                      |
| Slope up                    | Positive slope of the first applanation peak, from inflection point to peak | Rate of achieving peak planarity                                     |
| Slope down                  | Negative slope of the first applanation peak, from inflection point to peak | Rate of loss of peak planarity                                       |
| <b>Group 5</b>              |                                                                             |                                                                      |
| Hysteresis loop area        | Area enclosure by pressure vs applanation function                          | Hysteresis aggregated over entire deformation cycle except concavity |
| <b>Group 6</b>              |                                                                             |                                                                      |
| Impulse                     | Area under pressure vs time curve                                           | Air pressure intensity                                               |

<sup>a</sup>Data adapted from Hallahan KM, Sinha Roy A, Ambrósio R Jr, Salomao M, Dupps WJ Jr. Discriminant value of custom ocular response analyzer waveform derivatives in keratoconus. *Ophthalmology*. 2014;121:459-468.

TABLE C  
**Comparison of AUROC, Select Parameter Cut-off, Sensitivity, and Specificity for Variables Statistically Different Between Normal and FFKC Groups**

| Parameter           | AUROC | SE <sup>a</sup> | P <sup>b</sup> | Sensitivity | Specificity | Cut-off        | CI 95% <sup>c</sup> |
|---------------------|-------|-----------------|----------------|-------------|-------------|----------------|---------------------|
| FECTB               | 0.953 | 0.0237          | < .0001        | 85.71       | 98.68       | > 0.4653       | 0.890 to 0.986      |
| BAD-D               | 0.91  | 0.05            | < .0001        | 90.48       | 82.89       | > 0.96         | 0.835 to 0.959      |
| B BFTE Th           | 0.872 | 0.05            | < .0001        | 85.71       | 78.95       | > 0            | 0.789 to 0.931      |
| ART Maximum         | 0.863 | 0.06            | < .0001        | 85.71       | 78.95       | ≤ 435          | 0.778 to 0.924      |
| RPI Maximum         | 0.841 | 0.07            | < .0001        | 80.95       | 97.37       | > 1.29         | 0.753 to 0.907      |
| B BFS Th            | 0.839 | 0.06            | < .0001        | 85.71       | 75          | > 3            | 0.751 to 0.906      |
| ART Average         | 0.838 | 0.06            | < .0001        | 80.95       | 75          | ≤ 557          | 0.749 to 0.905      |
| RPI Average         | 0.836 | 0.06            | < .0001        | 80.95       | 75          | > 0.95         | 0.747 to 0.904      |
| B BFTE 4Z           | 0.779 | 0.06            | < .0001        | 71.43       | 67.11       | > 7            | 0.684 to 0.857      |
| p1area1             | 0.717 | 0.07            | .0009          | 71.43       | 63.16       | ≤ 1,237.5      | 0.617 to 0.804      |
| p1area              | 0.707 | 0.07            | .0014          | 66.67       | 65.79       | ≤ 2,885.188    | 0.606 to 0.795      |
| HLA                 | 0.688 | 0.07            | .0059          | 66.67       | 71.05       | ≤ 49.903       | 0.586 to 0.778      |
| h1                  | 0.663 | 0.07            | .0213          | 61.9        | 68.42       | ≤ 319.688      | 0.560 to 0.756      |
| h11                 | 0.663 | 0.07            | .0213          | 61.9        | 68.42       | ≤ 213.125      | 0.560 to 0.756      |
| Impulse             | 0.650 | 0.07            | .0323          | 66.67       | 67.11       | ≤ 4,401.975    | 0.546 to 0.744      |
| dive1               | 0.649 | 0.07            | .0297          | 61.90       | 63.16       | ≤ 279          | 0.545 to 0.743      |
| Pmax                | 0.648 | 0.07            | .0325          | 61.90       | 61.84       | ≤ 414          | 0.544 to 0.742      |
| BFS Fr              | 0.646 | 0.07            | .0267          | 61.90       | 63.16       | ≤ 7.86         | 0.542 to 0.740      |
| B BFTE Ax           | 0.645 | 0.08            | .0582          | 57.14       | 67.11       | > -1           | 0.541 to 0.739      |
| Ele B BFS 8-mm Apex | 0.645 | 0.0764          | .0582          | 57.14       | 67.11       | > 1            | 0.541 to 0.739      |
| uslope2             | 0.642 | 0.08            | .0646          | 57.14       | 69.74       | ≤ 65.5         | 0.538 to 0.736      |
| aspect2             | 0.630 | 0.0809          | .1072          | 57.14       | 67.11       | ≤ 13.425       | 0.526 to 0.726      |
| slew2               | 0.629 | 0.08            | .1040          | 61.90       | 63.16       | ≤ 274.125      | 0.525 to 0.725      |
| h2                  | 0.629 | 0.0796          | .1040          | 52.38       | 67.11       | ≤ 262.688      | 0.525 to 0.725      |
| h21                 | 0.629 | 0.0796          | .1040          | 52.38       | 67.11       | ≤ 175.125      | 0.525 to 0.725      |
| uslope1             | 0.627 | 0.0753          | .0928          | 61.90       | 53.95       | ≤ 54.714       | 0.522 to 0.723      |
| CRF                 | 0.622 | 0.0742          | .1012          | 61.90       | 68.42       | ≤ 8.9          | 0.517 to 0.718      |
| dslope2             | 0.622 | 0.0830          | .1432          | 52.38       | 69.74       | ≤ 16.732       | 0.517 to 0.718      |
| mslew2              | 0.622 | 0.08            | .1432          | 61.90       | 52.63       | ≤ 20.733       | 0.517 to 0.718      |
| uslope21            | 0.622 | 0.0824          | .1402          | 52.38       | 75.00       | ≤ 46.583       | 0.517 to 0.718      |
| mslew1              | 0.622 | 0.0727          | .0930          | 57.14       | 64.47       | ≤ 89           | 0.518 to 0.719      |
| Aindex              | 0.620 | 0.0738          | .1050          | 66.67       | 61.84       | ≤ 9.384        | 0.515 to 0.716      |
| A1                  | 0.617 | 0.0750          | .1171          | 57.14       | 60.53       | ≤ 525          | 0.513 to 0.714      |
| aspect21            | 0.617 | 0.0752          | .1184          | 52.38       | 72.37       | ≤ 16.563       | 0.513 to 0.714      |
| aspect1             | 0.614 | 0.0729          | .1176          | 57.14       | 60.53       | ≤ 15.694       | 0.510 to 0.711      |
| w2                  | 0.613 | 0.0811          | .1629          | 61.90       | 59.21       | > 19           | 0.509 to 0.710      |
| path1               | 0.610 | 0.0828          | .1830          | 52.38       | 67.11       | > 23.29        | 0.506 to 0.708      |
| Enh BFS Back 8 mm   | 0.610 | 0.0689          | .1094          | 61.90       | 61.84       | ≤ 6.49         | 0.506 to 0.708      |
| CH                  | 0.607 | 0.0766          | .1633          | 57.14       | 51.32       | ≤ 9.9          | 0.502 to 0.705      |
| dslope21            | 0.604 | 0.0740          | .1598          | 61.90       | 52.63       | ≤ 30.65        | 0.500 to 0.702      |
| Slope down          | 0.604 | 0.0742          | .1609          | 57.14       | 57.89       | > -92.74853801 | 0.500 to 0.702      |

TABLE C (cont'd)

**Comparison of AUROC, Select Parameter Cut-off, Sensitivity, and Specificity for Variables Statistically Different Between Normal and FFKC Groups**

| Parameter                       | AUROC | SE <sup>a</sup> | P <sup>b</sup> | Sensitivity | Specificity | Cut-off       | CI 95% <sup>c</sup> |
|---------------------------------|-------|-----------------|----------------|-------------|-------------|---------------|---------------------|
| A2                              | 0.601 | 0.0793          | .2033          | 61.90       | 60.53       | ≤ 457         | 0.496 to 0.699      |
| dslope1                         | 0.599 | 0.0723          | .1711          | 66.67       | 48.68       | ≤ 26.393      | 0.495 to 0.697      |
| IHD                             | 0.599 | 0.0663          | .1369          | 57.14       | 67.11       | > 5           | 0.494 to 0.697      |
| p2area                          | 0.597 | 0.0755          | .1981          | 57.14       | 60.53       | ≤ 2,013       | 0.493 to 0.695      |
| Aplhf                           | 0.589 | 0.0702          | .2035          | 57.14       | 61.84       | > 1.3         | 0.485 to 0.688      |
| Applanation onset time          | 0.588 | 0.0690          | .2022          | 66.67       | 50.00       | ≤ 7.65        | 0.484 to 0.687      |
| bindex                          | 0.587 | 0.0764          | .2545          | 52.38       | 59.21       | ≤ 9.656       | 0.483 to 0.686      |
| Concavity min                   | 0.586 | 0.0800          | .2798          | 61.90       | 55.26       | > 48.33333333 | 0.482 to 0.686      |
| w11                             | 0.585 | 0.0788          | .2834          | 47.62       | 63.16       | ≤ 10          | 0.480 to 0.684      |
| AvgP1P2                         | 0.584 | 0.0725          | .2486          | 57.14       | 51.32       | ≤ 172.5       | 0.479 to 0.683      |
| Slope up                        | 0.580 | 0.0779          | .3070          | 61.90       | 44.74       | ≤ 77.84313725 | 0.475 to 0.679      |
| Concavity mean                  | 0.570 | 0.0831          | .3982          | 52.38       | 57.89       | ≤ 113.0817204 | 0.466 to 0.670      |
| p2area1                         | 0.566 | 0.0730          | .3631          | 57.14       | 55.26       | ≤ 884.5       | 0.462 to 0.667      |
| path21                          | 0.564 | 0.0721          | .3756          | 61.90       | 47.37       | ≤ 35.025      | 0.459 to 0.664      |
| w21                             | 0.559 | 0.0738          | .4275          | 57.14       | 44.74       | > 8           | 0.454 to 0.659      |
| slew1                           | 0.558 | 0.0762          | .4445          | 61.90       | 53.95       | ≤ 56.357      | 0.454 to 0.659      |
| uslope11                        | 0.557 | 0.0790          | .4705          | 52.38       | 46.05       | ≤ 57          | 0.453 to 0.658      |
| ISV                             | 0.555 | 0.0669          | .4149          | 61.90       | 52.63       | ≤ 19          | 0.450 to 0.655      |
| Ele B BFS 8-mm max<br>4-mm zone | 0.554 | 0.0746          | .4729          | 52.38       | 59.21       | > 13          | 0.449 to 0.655      |
| dive2                           | 0.554 | 0.0830          | .5136          | 57.14       | 46.05       | ≤ 230.75      | 0.450 to 0.655      |
| aspect11                        | 0.540 | 0.0860          | .6411          | 61.90       | 46.05       | ≤ 23.778      | 0.436 to 0.642      |
| aspect11                        | 0.540 | 0.0860          | .6411          | 52.38       | 52.63       | ≤ 22.693      | 0.436 to 0.642      |
| IVA                             | 0.533 | 0.0718          | .6467          | 47.62       | 51.32       | ≤ 0.16        | 0.429 to 0.635      |
| w1                              | 0.530 | 0.0735          | .6822          | 61.90       | 51.32       | ≤ 21          | 0.426 to 0.632      |
| Concavity time                  | 0.529 | 0.0720          | .6856          | 57.14       | 50.00       | ≤ 12.975      | 0.425 to 0.631      |
| Lag time                        | 0.522 | 0.0684          | .7449          | 52.38       | 46.05       | ≤ .675        | 0.418 to 0.625      |
| path2                           | 0.505 | 0.0736          | .9457          | 42.86       | 46.05       | ≤ 25.232      | 0.402 to 0.608      |
| Applanation peak dif            | 0.505 | 0.0823          | .9544          | 57.14       | 52.63       | ≤ -112        | 0.401 to 0.608      |
| Concavity duration              | 0.501 | 0.0767          | .9935          | 52.38       | 43.42       | > 10.8        | 0.397 to 0.604      |
| dslope11                        | 0.501 | 0.0814          | .9877          | 47.62       | 44.74       | > 35.208      | 0.398 to 0.604      |

AUROC = area under the receiver operating characteristic curve; FFKC = forme fruste keratoconus; SE = standard error; CI = confidence interval; FECTB = function enhanced combined tomography and biomechanics; BAD-D = Belin/Ambrósio display; B BFTE Th = elevation B best fit toric ellipsoid thinnest; ART = Ambrósio relational thickness; RPI = relative pachymetric increase; B BFS Th = enhanced best fit sphere thinnest; B BFTE Ax = elevation B best fit toric ellipsoid apex; B BFTE 4Z = elevation B BFTE maximum 4-mm zone; HLA = hysteresis loop area; Pmax = pressure; BFS Fr = enhanced BFS front; CRF = corneal resistance factor; CH = corneal hysteresis; IHD = index of height decentration; ISV = index surface variation; IVA = index of vertical asymmetry

<sup>a</sup>Data adapted from DeLong ER, DeLong DM, Clarke-Pearson DL. Comparing the areas under two or more correlated receiver operating characteristic curves: a nonparametric approach. *Biometrics*. 1988;44:837-845.

<sup>b</sup>Area = 0.5.

<sup>c</sup>Binomial exact.

TABLE D  
**Comparison of All ORA Variables**

| Parameter              | Normal Group Mean $\pm$ SD (Range)           | FFKC Group Mean $\pm$ SD (Range)                | P <sup>a</sup>     |
|------------------------|----------------------------------------------|-------------------------------------------------|--------------------|
| p1area1                | 1,412.29 $\pm$ 447.54 (554.25 to 2,686.5)    | 1,085.19 $\pm$ 363.43 (553.5 to 1,762.38)       | .0024 <sup>b</sup> |
| p1area                 | 3,331.25 $\pm$ 910.23 (1,402 to 5,606.06)    | 2,644.83 $\pm$ 746.93 (1,450.13 to 4,008)       | .0037 <sup>b</sup> |
| HLA                    | 5,501.00 $\pm$ 15,339.15 (8,853 to 97,693)   | 43,614.55 $\pm$ 18,597.56 (-11,656.5 to 78,052) | .0086 <sup>b</sup> |
| h1                     | 377.05 $\pm$ 103.64 (218.62 to 640.87)       | 319.06 $\pm$ 102.74 (168.75 to 563.62)          | .0228 <sup>b</sup> |
| h11                    | 251.37 $\pm$ 69.09 (145.75 to 427.25)        | 212.70 $\pm$ 68.49 (112.5 to 375 .35)           | .0228 <sup>b</sup> |
| Impulse                | 4,536.22 $\pm$ 323.30 (3,775.35 to 5,314.08) | 4,402.86 $\pm$ 418.84 (3,796.58 to 5,807.36)    | .0363              |
| dive1                  | 323.77 $\pm$ 117.79 (38.75 to 614.5)         | 266.39 $\pm$ 115.82 (19.5 to 561.75)            | .0375              |
| Pmax                   | 423.74 $\pm$ 35.49 (344 to 505)              | 408.43 $\pm$ 45.09 (348 to 557)                 | .0391              |
| mslew2                 | 127.75 $\pm$ 56.57 (25.75 to 326)            | 97.08 $\pm$ 51.35 (19.25 to 173)                | .0421              |
| uslope2                | 85.99 $\pm$ 43.24 (14.67 to 239.12)          | 62.14 $\pm$ 45.55 (3.27 to 138.75)              | .0478              |
| slew2                  | 86.40 $\pm$ 42.63 (17.5 to 239.12)           | 63.70 $\pm$ 44.10 (6.66 to 138.75)              | .0487              |
| aspect11               | 24.42 $\pm$ 9.85 (10.11 to 55.70)            | 25.29 $\pm$ 16.21 (9.37 to 75.15)               | .5751              |
| aspect2                | 18.15 $\pm$ 8.99 (4.62 to 55.02)             | 14.54 $\pm$ 11.03 (1.76 to 42.44)               | .0685              |
| h2                     | 304.57 $\pm$ 90.38 (153.56 to 605.25)        | 252.13 $\pm$ 120.12 (72.18 to 466.87)           | .0705              |
| h21                    | 203.04 $\pm$ 60.25 (102.37 to 403.5)         | 168.09 $\pm$ 80.08 (48.12 to 311.25)            | .0705              |
| uslope1                | 63.29 $\pm$ 31.77 (23.22 to 187.16)          | 49.71 $\pm$ 25.17 (18.13 to 112.35)             | .0768              |
| mslew1                 | 106.28 $\pm$ 39.59 (53.5 to 239.5)           | 89.58 $\pm$ 30.31 (40.75 to 163.25)             | .0876              |
| CRF                    | 9.75 $\pm$ 1.78 (6 to 148)                   | 9.10 $\pm$ 1.99 (5 to 13.8)                     | .0893              |
| dslope2                | 23.63 $\pm$ 12.93 (5.58 to 83.21)            | 19.51 $\pm$ 14.99 (2.58 to 57.71)               | .0893              |
| uslope21               | 68.73 $\pm$ 31.87 (13.91 to 157)             | 54.66 $\pm$ 42.13 (1.73 to 137.62)              | .0893              |
| Aindex                 | 9.24 $\pm$ 1.05 (5.34 to 10)                 | 8.59 $\pm$ 1.52 (4.95 to 10)                    | .0943              |
| A1                     | 582.36 $\pm$ 148.06 (358 to 916)             | 519.00 $\pm$ 160.57 (279 to 860)                | .1005              |
| aspect21               | 26.23 $\pm$ 14.16 (4.56 to 69.9)             | 20.85 $\pm$ 15.21 (2.18 to 62.25)               | .1005              |
| aspect1                | 17.98 $\pm$ 6.19 (8.33 to 39.31)             | 15.34 $\pm$ 6.19 (6.75 to 31.31)                | .1109              |
| w2                     | 18.58 $\pm$ 4.57 (10 to 34)                  | 22.67 $\pm$ 9.02 (11 to 42)                     | .1139              |
| path1                  | 22.45 $\pm$ 3.98 (15.29 to 36.43)            | 24.96 $\pm$ 6.05 (16.18 to 36.43)               | .1232              |
| CH                     | 10.15 $\pm$ 1.62 (6.2 to 14.1)               | 9.27 $\pm$ 2.16 (6 to 13.1)                     | .1353              |
| dslope21               | 40.85 $\pm$ 26.15 (5.79 to 135.12)           | 32.25 $\pm$ 24.35 (3.30 to 104.87)              | .1459              |
| Slope down             | -105.20 $\pm$ 36.41 (-249.56 to -55.47)      | -93.03 $\pm$ 38.26 (-181.99 to -40.32)          | .1459              |
| A2                     | 476.96 $\pm$ 128.73 (256 to 807)             | 418.38 $\pm$ 174.69 (141 to 737)                | .1585              |
| dslope1                | 26.06 $\pm$ 8.89 (11.60 to 52.81)            | 23.25 $\pm$ 9.42 (9.85 to 45.1)                 | .1664              |
| p2area                 | 2,183.22 $\pm$ 550.90 (1,163.43 to 3,829.81) | 1,928.98 $\pm$ 597.38 (447.5 to 2,909.63)       | .1746              |
| Aplhf                  | 1.32 $\pm$ 0.31 (0.8 to 2.4)                 | 1.55 $\pm$ 0.84 (0.9 to 5)                      | .212               |
| Applanation onset time | 7.69 $\pm$ 0 .43 (6.6 to 8.6)                | 7.66 $\pm$ 0.77 (6.75 to 10.65)                 | .2185              |
| bindex                 | 9.34 $\pm$ 1.08 (4.90 to 10)                 | 8.42 $\pm$ 2.32 (1.80 to 10)                    | .2234              |
| Concavity min          | 48.84 $\pm$ 9.88 (15.33 to 78.33)            | 51.87 $\pm$ 12.44 (23.66 to 167.33)             | .2268              |
| w11                    | 11.00 $\pm$ 2.45 (5 to 17)                   | 10.05 $\pm$ 3.25 (5 to 16)                      | .237               |
| AvgP1P2                | 176.00 $\pm$ 22.23 (129 to 235.5)            | 179.43 $\pm$ 55.85 (140.5 to 411.5)             | .2423              |
| Slope up               | 76.83 $\pm$ 25.59 (33.70 to 148.92)          | 66.57 $\pm$ 30.08 (17.26 to 121)                | .266               |
| Concavity mean         | 119.83 $\pm$ 21.32 (81.88 to 185.03)         | 117.94 $\pm$ 44.04 (71.91 to 279.63)            | .3266              |
| p2area1                | 927.63 $\pm$ 274.63 (486 to 1,868)           | 831.18 $\pm$ 277.80 (206.5 to 1,316.5)          | .3532              |
| path21                 | 36.04 $\pm$ 9.34 (14.58 to 66.56)            | 34.00 $\pm$ 8.43 (21.34 to 52.54)               | .3716              |
| w21                    | 9.01 $\pm$ 3.05 (4 to 23)                    | 10.67 $\pm$ 5.31 (5 to 24)                      | .4128              |
| slew1                  | 64.82 $\pm$ 31.25 (19.37 to 187.16)          | 56.41 $\pm$ 25.13 (19.5 to 112.35)              | .4153              |
| uslope11               | 62.02 $\pm$ 31.59 (14.5 to 181.37)           | 56.78 $\pm$ 31.67 (13.83 to 1,443.37)           | .4254              |
| dive2                  | 235.69 $\pm$ 84.44 (87.5 to 551.25)          | 209.27 $\pm$ 111.58 (20 to 409)                 | .4487              |



TABLE D (cont'd)

**Comparison of All ORA Variables**

| <b>Parameter</b>     | <b>Normal Group Mean <math>\pm</math> SD (Range)</b> | <b>FFKC Group Mean <math>\pm</math> SD (Range)</b> | <b>P<sup>a</sup></b> |
|----------------------|------------------------------------------------------|----------------------------------------------------|----------------------|
| aspect11             | 24.42 $\pm$ 9.85 (10.11 to 55.70)                    | 25.29 $\pm$ 16.21 (9.37 to 75.15)                  | .5751                |
| w1                   | 21.57 $\pm$ 2.70 (15 to 28)                          | 21.71 $\pm$ 3.51 (17 to 31)                        | .6742                |
| Concavity time       | 12.92 $\pm$ 0.86 (10.42 to 14.62)                    | 12.83 $\pm$ 0.87 (11.1 to 14.4)                    | .6838                |
| Lag time             | 0.79 $\pm$ 0.55 (0.1 to 2.32)                        | 0.74 $\pm$ 0.50 (0.075 to 2.25)                    | .7558                |
| path2                | 25.61 $\pm$ 6.63 (11.57 to 51.14)                    | 25.33 $\pm$ 6.05 (15.28 to 36.86)                  | .9441                |
| Applanation peak dif | -105.39 $\pm$ 126.27 (-433 to 168)                   | -100.62 $\pm$ 169.75 (-353 to 199)                 | .9476                |
| dslope11             | 40.62 $\pm$ 17.45 (14.10 to 104.06)                  | 44.78 $\pm$ 27.95 (1,434 to 121.62)                | .986                 |
| Concavity duration   | 10.91 $\pm$ 0.45 (9.9 to 12.15)                      | 10.69 $\pm$ 1.14 (6.15 to 11.625)                  | .993                 |

ORA = Ocular Response Analyzer (Reichert Ophthalmic Instruments, Depew, NY); SD = standard deviation; FFKC = forme fruste keratoconus; HLA = hysteresis loop area; Pmax = pressure; CRF = corneal resistance factor; CH = corneal hysteresis

<sup>a</sup>Mann-Whitney U test.

<sup>b</sup>Statistically significant difference after Bonferroni correction.
